# Supplementary material for: Adherence to the Kidney Disease: Improving Global Outcomes CKD Guideline in Nephrology Practice Across Countries
Source: PubMed Central journal article supplement — Kidney Int Rep. 2020 Dec 17;6(2):437–48. doi: 10.1016/j.ekir.2020.11.039 (PMC7879121; doi:10.1016/j.ekir.2020.11.039), 2020-12-17

## **SUPPLEMENTARY MATERIALS**

**Supplementary Table 1. Patient characteristics, by CKD stage and country**

**Supplementary Table 2. Albuminuria monitoring\* in CKD by diabetes status and country**

**Supplementary Figure 1. HBA1c levels (%) among patients with diabetes, by CKD stage and country**

**Supplementary Figure 2. Percentages of patients receiving recommended lifestyle and dietary counseling, and smoking, by CKD stage and country**

**Supplementary Table 1. Patient characteristics, by CKD stage and country**

| Characteristics                    | Brazil    |           |           | France    |           |           | Germany     |             |             | US        |           |           |
|------------------------------------|-----------|-----------|-----------|-----------|-----------|-----------|-------------|-------------|-------------|-----------|-----------|-----------|
|                                    | 3a        | 3b        | 4-5       | 3a        | 3b        | 4-5       | 3a          | 3b          | 4-5         | 3a        | 3b        | 4-5       |
| # of patients                      | 73        | 202       | 613       | 471       | 1135      | 1363      | 168         | 318         | 1350        | 110       | 352       | 1049      |
| Age, years                         | 63.6±13.7 | 64.9±14.8 | 65.6±15.0 | 64.1±12.5 | 67.2±12.1 | 67.7±13.5 | 69.4 ± 12.5 | 70.1 ± 13.1 | 72.8 ± 12.1 | 65.6±11.9 | 67.9±11.7 | 69.0±13.3 |
| Women                              | 48%       | 41%       | 49%       | 29%       | 34%       | 37%       | 32%         | 38%         | 45%         | 44%       | 45%       | 50%       |
| Black                              | 38%       | 24%       | 25%       | 5%        | 2%        | 2%        | -           | -           | -           | 24%       | 21%       | 21%       |
| Body mass index, kg/m <sup>2</sup> | 27.0±4.7  | 28.1±5.1  | 27.8±5.5  | 28.1±5.5  | 28.8±5.9  | 28.8±5.9  | 29.0 ± 5.2  | 29.4 ± 5.6  | 29.2 ± 5.7  | 31.7±6.9  | 31.5±6.7  | 31.2±7.1  |
| <b>Comorbidities</b>               |           |           |           |           |           |           |             |             |             |           |           |           |
| Obesity (≥30 kg/m <sup>2</sup> )   | 27%       | 36%       | 32%       | 30%       | 36%       | 37%       | 36%         | 44%         | 39%         | 56%       | 54%       | 51%       |
| Diabetes                           | 47%       | 47%       | 49%       | 38%       | 44%       | 44%       | 43%         | 46%         | 49%         | 59%       | 54%       | 59%       |
| Hypertension                       | 89%       | 97%       | 97%       | 86%       | 91%       | 92%       | 96%         | 95%         | 96%         | 96%       | 96%       | 96%       |
| CVD (any)                          | 35%       | 42%       | 48%       | 50%       | 52%       | 55%       | 47%         | 51%         | 55%         | 42%       | 49%       | 51%       |
| CHD                                | 10%       | 22%       | 23%       | 22%       | 24%       | 27%       | 26%         | 31%         | 29%         | 28%       | 29%       | 31%       |
| Heart failure                      | 7%        | 12%       | 18%       | 9%        | 13%       | 15%       | 8%          | 11%         | 16%         | 7%        | 16%       | 17%       |
| Acute kidney injury*               | 2%        | 2%        | 8%        | 16%       | 24%       | 27%       | 5%          | 5%          | 7%          | 1%        | 5%        | 7%        |
| <b>Lab results</b>                 |           |           |           |           |           |           |             |             |             |           |           |           |
| eGFR, mL/min/1.73 m <sup>2</sup>   | 50.2±4.0  | 36.0±4.4  | 19.4±6.4  | 50.5±4.0  | 36.8±4.2  | 22.1±4.9  | 51.2±4.0    | 36.7±4.2    | 22.9±4.1    | 51.7±4.5  | 36.0±4.3  | 20.0±6.0  |
| HbA1c in patients with diabetes, % | 7.2 ± 1.4 | 7.3 ± 1.5 | 7.2 ± 1.5 | 7.2 ± 1.2 | 7.2 ± 1.2 | 7.1 ± 1.2 | 7.0 ± 0.9   | 7.3 ± 1.8   | 7.1 ± 1.1   | 7.8 ± 2.7 | 7.5 ± 1.5 | 7.3 ± 1.6 |
| <b>Medications prescribed</b>      |           |           |           |           |           |           |             |             |             |           |           |           |
| % with no medications              | 0%        | 0%        | 0.5%      | 1%        | 0.4%      | 0.1%      | 0.8%        | 0.4%        | 0.8%        | 0%        | 0%        | 0.3%      |
| # of medications                   | 6 [4,8]   | 6 [5,9]   | 7 [5,10]  | 6 [4,9]   | 7 [5,10]  | 8 [6,11]  | 9 [6,11]    | 9 [6,12]    | 10 [7,13]   | 10 [6,15] | 10 [7,13] | 11 [8,15] |
| Antihypertensive medications       | 91%       | 95%       | 95%       | 88%       | 93%       | 96%       | 99%         | 96%         | 96%         | 91%       | 94%       | 95%       |
| Antidiabetic medications           | 38%       | 35%       | 39%       | 33%       | 37%       | 36%       | 30%         | 35%         | 34%         | 46%       | 43%       | 42%       |

Results are shown as prevalence, mean±SD or median [25<sup>th</sup>,75<sup>th</sup> percentiles]

\*Any acute kidney injury event at baseline or in 6-month interval before baseline in Brazil, Germany, and the US; history of acute kidney injury ever in France

eGFR: estimated glomerular filtration rate; CKD: chronic kidney disease

Supplementary Table 2. Albuminuria monitoring\* in CKD by diabetes status and country

| Characteristics                                                 | Brazil   |     |     | France   |      |      | Germany  |     |      | US       |      |      |
|-----------------------------------------------------------------|----------|-----|-----|----------|------|------|----------|-----|------|----------|------|------|
|                                                                 | Diabetes |     | All | Diabetes |      | All  | Diabetes |     | All  | Diabetes |      | All  |
|                                                                 | No       | Yes |     | No       | Yes  |      | No       | Yes |      | No       | Yes  |      |
| <b># of patients</b>                                            | 458      | 430 | 888 | 1687     | 1275 | 2969 | 913      | 837 | 1836 | 624      | 887  | 1511 |
| <b>Any albuminuria or proteinuria monitoring<sup>a</sup></b>    | 71%      | 69% | 70% | 89%      | 89%  | 89%  | 46%      | 52% | 49%  | 61%      | 63%  | 62%  |
| <b>Albuminuria or proteinuria measurement<sup>b</sup></b>       | 33%      | 40% | 36% | 89%      | 89%  | 89%  | 35%      | 38% | 36%  | 41%      | 44%  | 43%  |
| • Albuminuria (either spot or 24-hour urine)                    | 8%       | 9%  | 8%  | 31%      | 39%  | 34%  | 15%      | 14% | 14%  | 6%       | 9%   | 8%   |
| o spot urine (as recommended)                                   | 6%       | 4%  | 5%  | 27%      | 32%  | 29%  | 9%       | 8%  | 8%   | 6%       | 9%   | 8%   |
| o 24-hour                                                       | 7%       | 8%  | 8%  | 15%      | 18%  | 16%  | 8%       | 7%  | 7%   | 0.2%     | 0.2% | 0.2% |
| • Proteinuria alone (either spot or 24-hour urine) <sup>c</sup> | 25%      | 31% | 28% | 58%      | 50%  | 55%  | 20%      | 24% | 22%  | 35%      | 35%  | 35%  |
| o spot urine                                                    | 4%       | 6%  | 5%  | 45%      | 39%  | 42%  | 3%       | 2%  | 2%   | 33%      | 33%  | 33%  |
| o 24-hour                                                       | 22%      | 25% | 23% | 39%      | 33%  | 36%  | 17%      | 22% | 20%  | 3%       | 4%   | 3%   |
| <b>Dipstick alone<sup>d</sup></b>                               | 38%      | 29% | 34% | 0.2%     | 0%   | 0.1% | 12%      | 15% | 13%  | 21%      | 19%  | 19%  |
| <b>Albuminuria category (not using dipstick)<sup>e</sup></b>    |          |     |     |          |      |      |          |     |      |          |      |      |
| A1 (Normal or mildly increased)                                 | 20%      | 20% | 20% | 31%      | 22%  | 27%  | 24%      | 32% | 28%  | 26%      | 18%  | 21%  |
| A2 (Moderately increased)                                       | 26%      | 23% | 25% | 32%      | 31%  | 32%  | 35%      | 30% | 33%  | 26%      | 21%  | 23%  |
| A3 (Severely increased)                                         | 40%      | 39% | 39% | 31%      | 37%  | 33%  | 31%      | 24% | 27%  | 37%      | 43%  | 41%  |
| A3 (Severely increased, nephrotic syndrome)                     | 14%      | 18% | 16% | 6%       | 11%  | 8%   | 10%      | 14% | 12%  | 11%      | 18%  | 15%  |
| <b>Albuminuria category (using dipstick)<sup>f</sup></b>        |          |     |     |          |      |      |          |     |      |          |      |      |
| A1 (Normal or mildly increased)                                 | 48%      | 40% | 44% | 31%      | 22%  | 27%  | 34%      | 41% | 37%  | 36%      | 28%  | 31%  |
| A2 (Moderately increased)                                       | 20%      | 20% | 20% | 32%      | 31%  | 32%  | 30%      | 25% | 28%  | 25%      | 20%  | 22%  |
| A3 (Severely increased)                                         | 23%      | 27% | 25% | 31%      | 37%  | 33%  | 26%      | 19% | 22%  | 28%      | 34%  | 32%  |
| A3 (Severely increased, nephrotic syndrome)                     | 9%       | 13% | 11% | 6%       | 11%  | 8%   | 10%      | 15% | 13%  | 11%      | 19%  | 16%  |

\* Routine laboratory measurements in Brazil, Germany, and the US, and requested per study protocol in France

<sup>a</sup> Either albuminuria, proteinuria, or dipstick measurement

<sup>b</sup> Either albuminuria or proteinuria measurement, not counting dipstick

<sup>c</sup> Proteinuria measurement when albuminuria was not measured

<sup>d</sup> Dipstick measurement when neither proteinuria nor albuminuria was measured

<sup>e</sup> Definition of albuminuria categories (not using dipstick):

Hierarchy of measurements: ACR → PCR → 24-hour albuminuria (AER) → 24-hour proteinuria (PER)

A1 (Normal to mildly increased): albuminuria < 30 (proteinuria < 150) mg/g or mg/24 h

A2 (Moderately increased): 30 to 300 (150 to 500) mg/g or mg/24 h

A3 (Severely increased,): > 300 to 2200 (500 to 3000) mg/g or mg/24 h

A3 (Severely increased, nephrotic syndrome): >2200 (>3000) mg/g or mg/24 h.

<sup>f</sup> Definition of albuminuria categories (using dipstick):

Hierarchy of measurements: ACR → PCR → 24-hour albuminuria (AER) → 24-hour proteinuria (PER) → Dipstick

A1: as above, plus Dipstick none or trace

A2: as above, plus Dipstick 1+

A3: as above, plus Dipstick 2+

A3 (nephrotic syndrome): as above, plus Dipstick 3+ or more

Supplementary Figure 1. HbA1c levels (%) among patients with diabetes, by CKD stage and country

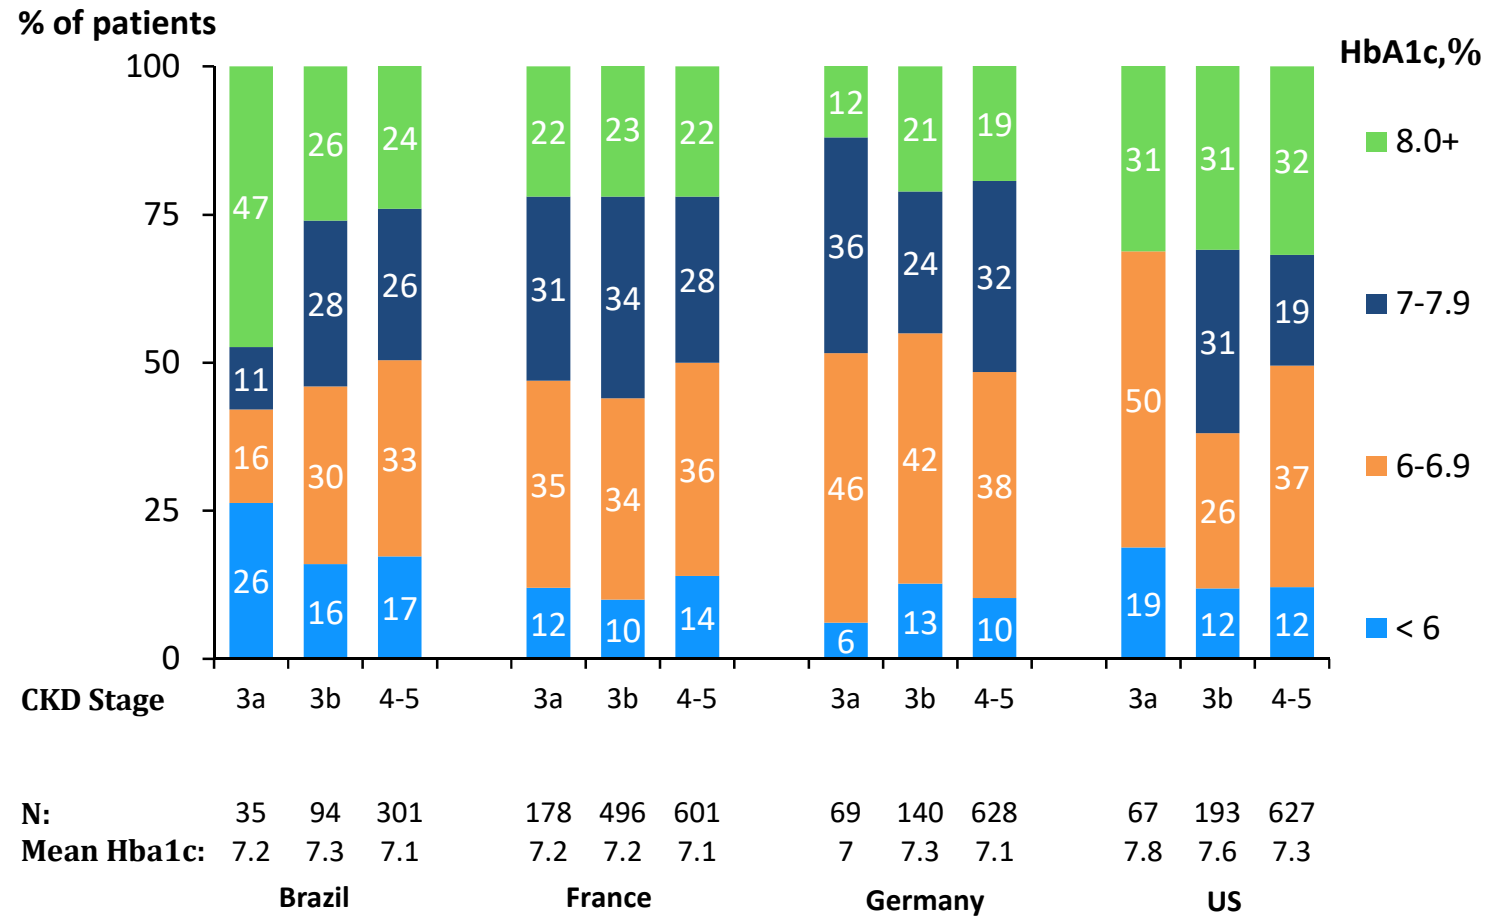

Supplementary Figure 2. Percentages of patients receiving recommended lifestyle and dietary counseling, and smoking, by CKD stage and country - *Data from the Patient Questionnaire*

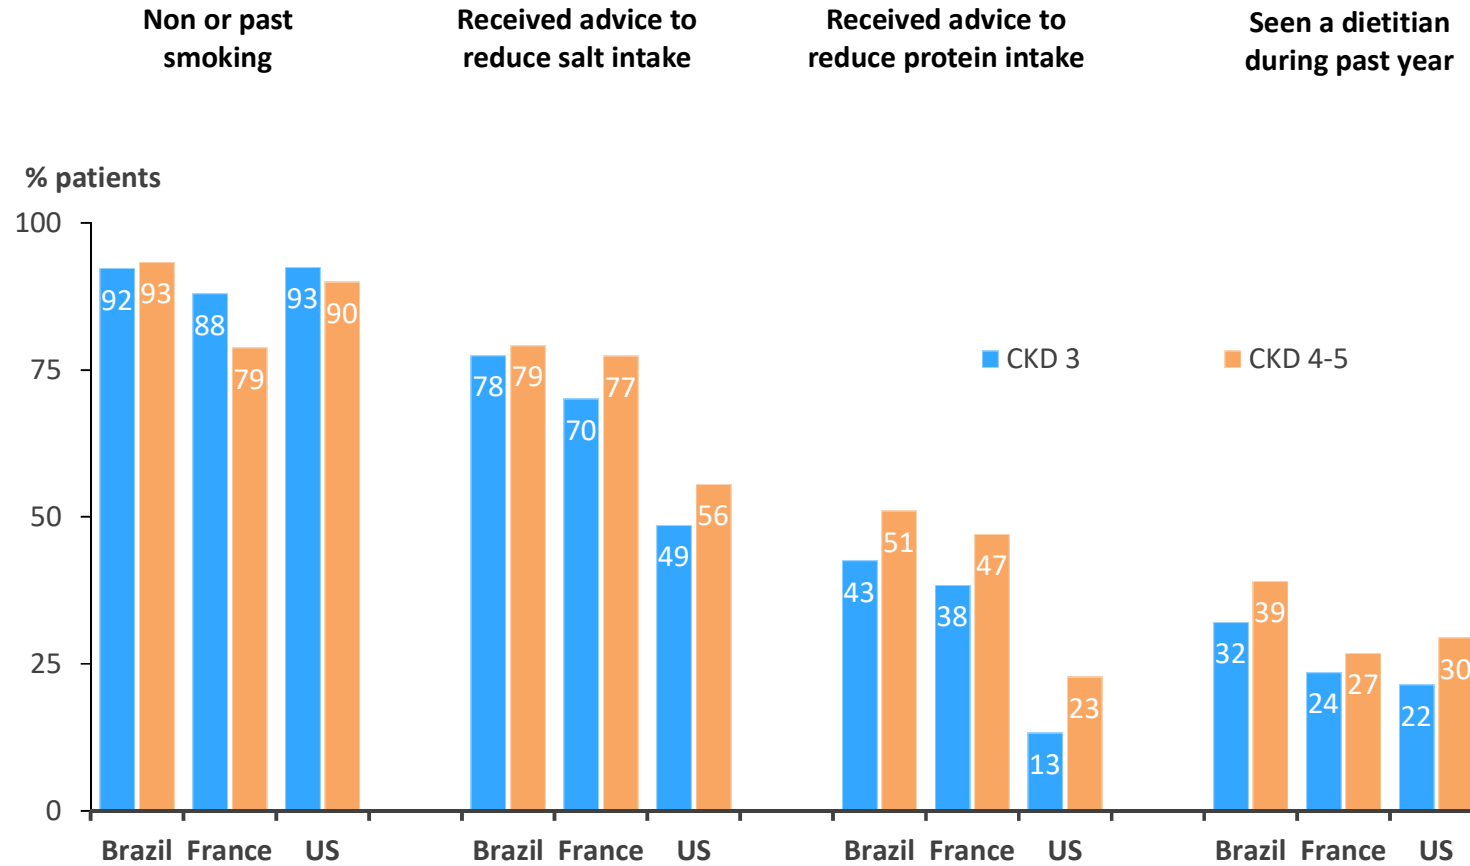

Supplement: mmc1.pdf [file mmc1.pdf]
